# Supplementary material
Source: Springer Nature journal article supplement (https://www.springermedizin.de/resource/supplementary/12879_2011_1616_MOESM3_ESM.pdf/9442942)

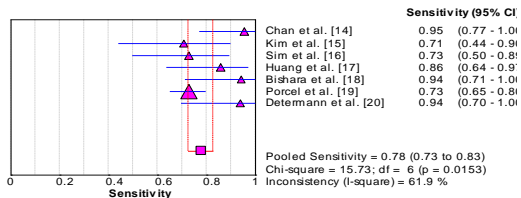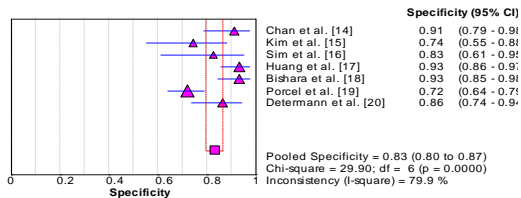

A

B

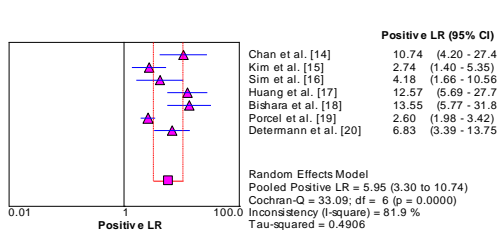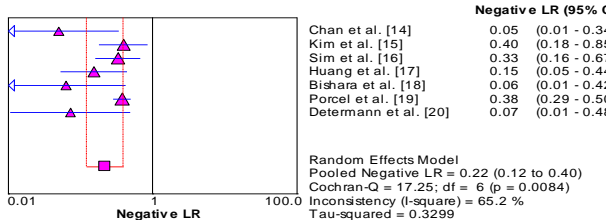

C

D

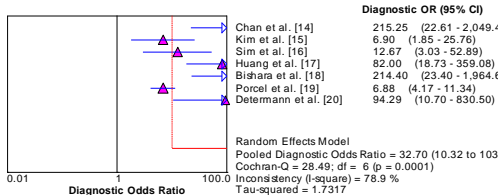

E

Supplement: MOESM3 [file 9442942]
